# Supplementary material for: Acute renal effects of the GLP-1 receptor agonist exenatide in overweight type 2 diabetes patients: a randomised, double-blind, placebo-controlled trial
Source: Springer Nature journal article supplement (doi:10.1007/s00125-016-3938-z), 2016-04-01
Supplement: MOESM5 [file 10017766]

# ESM accompanying the original article “Acute renal effects of the GLP-1 receptor agonist exenatide in overweight type 2 diabetes patients: a randomised, double-blind, placebo-controlled trial” by Tonneijck L et al

**ESM Fig. 4** Subgroup-analyses of GFR response to intravenous GLP-1RA exenatide administration in overweight patients with type 2 diabetes

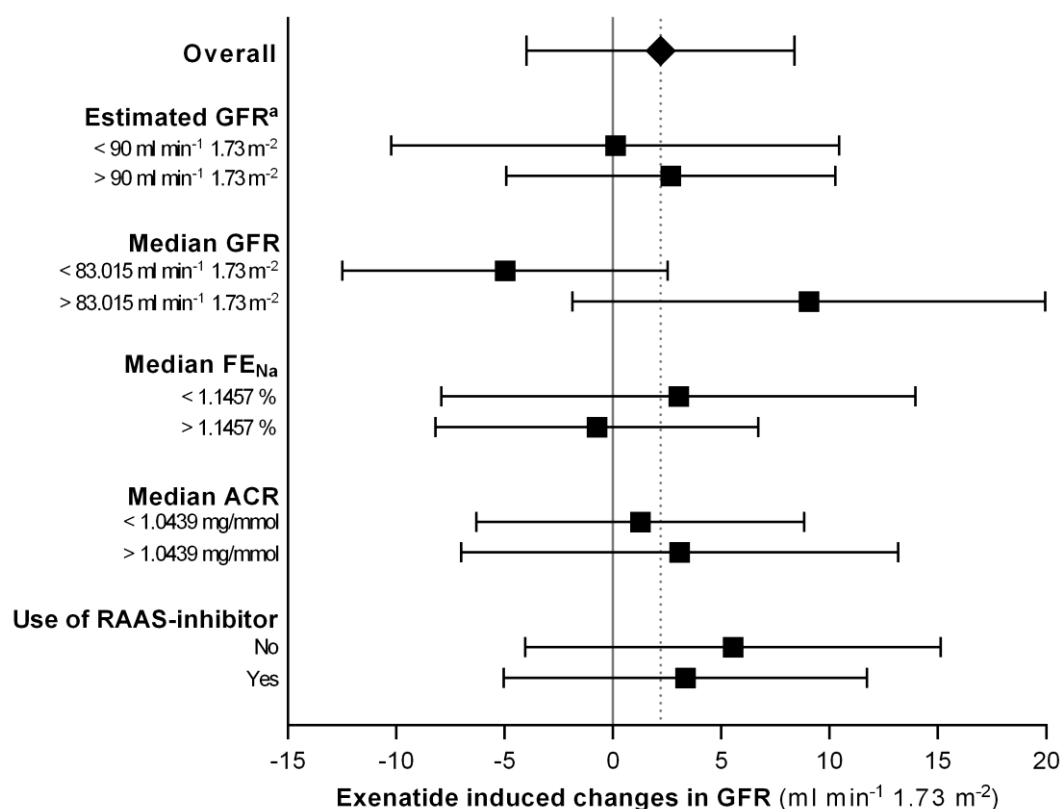

Data are shown as mean (95% confidence interval)

<sup>a</sup>Calculated using the MDRD study equation:  $186 \times (\text{serum creatinine [mg/dl]})^{-1.154} \times (\text{age [year]})^{-0.203} \times (0.742, \text{ if female})$  [1]

## References

1. Myers GL, Miller WG, Coresh J, et al. (2006) Recommendations for improving serum creatinine measurement: A report from the Laboratory Working Group of the National Kidney Disease Education Program. Clin Chem 52:5–18.
