# Supplementary material for: Acute renal effects of the GLP-1 receptor agonist exenatide in overweight type 2 diabetes patients: a randomised, double-blind, placebo-controlled trial
Source: Springer Nature journal article supplement (doi:10.1007/s00125-016-3938-z), 2016-04-01
Supplement: MOESM6 [file 10017766]

# ESM accompanying the original article “Acute renal effects of the GLP-1 receptor agonist exenatide in overweight type 2 diabetes patients: a randomised, double-blind, placebo-controlled trial” by Tonneijck L et al

**ESM Table 1** Baseline characteristics of the subgroup in which renin response to intravenous GLP-1RA exenatide administration in overweight patients with type 2 diabetes was measured

| Characteristic                                            | Placebo (n=12)    | Exenatide (n=9)   |
|-----------------------------------------------------------|-------------------|-------------------|
| Clinical characteristics                                  |                   |                   |
| Male sex, <i>n</i> (%)                                    | 11 (91.7)         | 6 (66.7)          |
| Age, years                                                | 65±8              | 65±6              |
| BMI, kg/m <sup>2</sup>                                    | 31.8 (30.0, 34.6) | 31.8 (28.5, 36.1) |
| Current smoker, <i>n</i> (%)                              | 3 (25.0)          | 1 (11.1)          |
| Waist circumference, cm                                   | 112.2±7.6         | 112.2±14.8        |
| Systolic BP, mmHg                                         | 134±13            | 140±15            |
| Diastolic BP, mmHg                                        | 78±6              | 78±8              |
| MAP, mmHg                                                 | 96±8              | 99±11             |
| HR, bpm                                                   | 66±10             | 65±6              |
| Diabetes history characteristics                          |                   |                   |
| Type 2 diabetes duration, years                           | 8 (4, 15)         | 8 (5, 14)         |
| Metformin use, <i>n</i> (%)                               | 11 (91.7)         | 8 (88.9)          |
| Sulfonylurea use, <i>n</i> (%)                            | 6 (50.0)          | 5 (55.6)          |
| Antihypertensive medication use, <i>n</i> (%)             | 9 (75.0)          | 9 (100.0)         |
| RAAS inhibitor use, <i>n</i> (%)                          | 8 (66.7)          | 8 (88.9)          |
| Biochemistry                                              |                   |                   |
| HbA <sub>1c</sub> , %                                     | 7.5±0.6           | 7.4±0.5           |
| HbA <sub>1c</sub> , mmol/mol                              | 58±7              | 58±6              |
| Fasting plasma glucose, mmol/l                            | 8.8±2.2           | 8.2±0.8           |
| Estimated GFR, ml min <sup>-1</sup> 1.73 m <sup>-2a</sup> | 92 (78, 105)      | 80 (78, 92)       |

Data are shown as percentage (%), mean ± SD or median (IQR)

<sup>a</sup>Calculated using the MDRD study equation:  $186 \times (\text{serum creatinine [mg/dl]})^{-1.154} \times (\text{age [year]})^{-0.203} \times (0.742, \text{ if female})$  [1]

During placebo-infusion PRC changed from median (IQR) 12.9 (3.2, 31.5) to 18.7 (3.7, 29.9) pg/ml, whereas this was from 18.0 (10.3, 31.3) to 15.5 (8.9,18.5) pg/ml during exenatide. No between-group difference was observed (p=0.401).

## References

1. Myers GL, Miller WG, Coresh J, et al. (2006) Recommendations for improving serum creatinine measurement: A report from the Laboratory Working Group of the National Kidney Disease Education Program. Clin Chem 52:5–18.
